# Supplementary material for: Guidelines and recommendations about virtual mental health services from high-income countries: a rapid review
Source: PubMed Central journal article supplement — BMJ Open. 2024 Feb 22;14(2):e079244. doi: 10.1136/bmjopen-2023-079244 (PMC10884256; doi:10.1136/bmjopen-2023-079244), 2024-02-22
Supplement: bmjopen-2023-079244supp003.pdf [file bmjopen-2023-079244supp003.pdf]

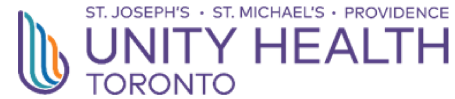

## Appendix C: Search Strategies

**Summary of Results per Database**

| Database                                                                                             | Date Searched | Number of Results |
|------------------------------------------------------------------------------------------------------|---------------|-------------------|
| Medline (Ovid)                                                                                       | July 20, 2022 | 887               |
| Embase (Ovid)                                                                                        | July 21, 2022 | 1425              |
| PsycINFO (Ovid)                                                                                      | July 20, 2022 | 271               |
| Cochrane Central Register of Controlled Trials and<br>Cochrane Database of Systematic Reviews (Ovid) | July 22, 2022 | 79                |
| CINAHL (Ebscohost)                                                                                   | July 22, 2022 | 658               |
| Scopus                                                                                               | July 22, 2022 | 630               |
| Total Number of Results                                                                              |               | <b>3,950</b>      |
| Total Number of Results after de-duplication in EndNote                                              |               | <b>2,760</b>      |

We searched using a comprehensive combination of subject headings and keywords, adapted for each database, for the concepts telemedicine and mental illnesses, combined with adapted search filters designed to retrieve guidelines that was created by the Canadian Agency for Drugs and Technology in Health [CADTH Search Filters Database. Ottawa: CADTH; 2022: <https://searchfilters.cadth.ca>. Accessed 2022-7-21.]

The results were limited to English language; commentaries, letters, editorials, book reviews, conference proceedings were excluded.

The above listed databases were searched from 2010 to the present on July 20-22, 2022

There were 3,950 total results. Following duplicate record removal in EndNote there were 2,760 results.

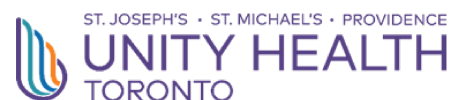

### Search Histories:

#### Ovid MEDLINE(R) and Epub Ahead of Print, In-Process, In-Data-Review & Other Non-Indexed Citations <1946 to July 19, 2022>

- 1 mental disorders/ or exp anxiety disorders/ or exp "bipolar and related disorders"/ or exp "disruptive, impulse control, and conduct disorders"/ or exp dissociative disorders/ or exp "feeding and eating disorders"/ or exp mood disorders/ or exp tic disorders/ or neurotic disorders/ or exp personality disorders/ or exp "schizophrenia spectrum and other psychotic disorders"/ or exp somatoform disorders/ or exp "trauma and stressor related disorders"/ 639467
- 2 Mentally Ill Persons/ 6395
- 3 Mental Health/ 54136
- 4 psychotherapy/ or exp behavior therapy/ or emotion-focused therapy/ or exp feedback, psychological/ or interpersonal psychotherapy/ or person-centered psychotherapy/ or exp psychoanalytic therapy/ or psychosocial intervention/ or exp psychotherapeutic processes/ or psychotherapy, brief/ or psychotherapy, multiple/ or psychotherapy, psychodynamic/ or psychotherapy, rational-emotive/ or reality therapy/ or socioenvironmental therapy/ or exp psychotherapy, group/ or therapeutic alliance/ 184009
- 5 Counseling/ 38736
- 6 psychiatric rehabilitation/ or mental health recovery/ or mental health services/ or exp emergency services, psychiatric/ or social work, psychiatric/ 42495
- 7 affective symptoms/ or depression/ or exp stress, psychological/ or exp compulsive behavior/ or exp anger/ or anxiety/ or self-injurious behavior/ or suicidal ideation/ or suicide, attempted/ 393283
- 8 Psychology, Clinical/ 3242
- 9 psychiatry/ or community psychiatry/ or psychoanalysis/ or psychosomatic medicine/ 58258
- 10 Community Mental Health Services/ or exp Community Mental Health Centers/ 21937
- 11 (mental health or mental illness\* or mentally ill or mental disorder\* or psychiatr\* or psycholog\* or psychosis or psychotic or psychoses or bipolar or depression or depressive or anxiety or schizophreni\* or PTSD or post traumatic or posttraumatic or stress disorder\* or suicidal or attempt\* suicide or suicide attempt\* or self harm or self injur\* or counselling or counseling or psychotherap\* or behaviour\* therap\* or behavior\* therap\* or cognitive therap\* or Obsessive Compulsive Disorder\* or OCD or Panic Disorder\* or Phobic Disorder\* or Anorexi\* or Binge Eating or bulimi\* or Mood Disorder\* or personality disorder\* or dissociative disorder\* or eating disorder\* or Schizoaffective Disorder\* or affective Disorder\*).tw,kf. 1555083
- 12 or/1-11 1924016
- 13 telemedicine/ 34108
- 14 Videoconferencing/ 2246
- 15 remote consultation/ 5556
- 16 (telecommunications/ or telephone/ or exp cell phone/ or computer communication networks/ or internet/ or internet access/ or internet-based intervention/) and (professional-patient relations/ or nurse-patient relations/ or physician-patient relations/) 3019



- 17 (telemedicine or tele-medicine or telehealth\* or tele health\* or remote consult\* or virtual care or virtual mental health or virtual delivery or virtual health\* or virtual primary care or virtual service\* or phone call\* or telephone call\*).tw,kf. 38890
- 18 (therap\* adj3 (internet or web or phone\* or telephone\* or computer\* or online or remote or smartphone\* or cellphone\* or virtual or video\* or zoom or digital)).tw,kf. 6302
- 19 (psychotherap\* adj3 (internet or web or phone\* or telephone\* or computer\* or online or remote or smartphone\* or cellphone\* or virtual or video\* or zoom or digital)).tw,kf. 567
- 20 (mental health care adj3 (internet or web or phone\* or telephone\* or computer\* or online or remote or smartphone\* or cellphone\* or virtual or video\* or zoom or digital)).tw,kf. 122
- 21 (mental healthcare adj3 (internet or web or phone\* or telephone\* or computer\* or online or remote or smartphone\* or cellphone\* or virtual or video\* or zoom or digital)).tw,kf. 41
- 22 or/13-21 69259
- 23 Distance Counseling/ 76
- 24 (Telemental health or Tele-mental health or telepsych\* or tele psych\*).tw,kf. 1534
- 25 (12 and 22) or 23 or 24 14698
- 26 exp clinical pathway/ 7549
- 27 exp clinical protocol/ 185333
- 28 clinical protocols/ 29712
- 29 exp consensus/ 18793
- 30 exp consensus development conference/ 12614
- 31 exp consensus development conferences as topic/ 2996
- 32 critical pathways/ 7549
- 33 exp guideline/ 37125
- 34 guidelines as topic/ 42015
- 35 exp practice guideline/ 29915
- 36 practice guidelines as topic/ 127363
- 37 health planning guidelines/ 4164
- 38 exp treatment guidelines/ 0
- 39 Clinical Decision Rules/ 870
- 40 (guideline or practice guideline or consensus development conference or consensus development conference, NIH).pt. 46980
- 41 (position statement\* or policy statement\* or practice parameter\* or best practice\*).ti,ab,kf. 42012
- 42 (standards or guideline or guidelines).ti,kf. 127739
- 43 ((practice or treatment\* or clinical) adj guideline\*).ab. 48691
- 44 (CPG or CPGs).ti. 6243
- 45 consensus\*.ti,kf. 32034
- 46 consensus\*.ab. /freq=2 31214
- 47 ((critical or clinical or practice) adj2 (path or paths or pathway or pathways or protocol\*)).ti,ab,kf. 24588
- 48 recommendat\*.ti,kf. or guideline recommendation\*.ab. 54139
- 49 (care adj2 (standard or path or paths or pathway or pathways or map or maps or plan or plans)).ti,ab,kf. 75520

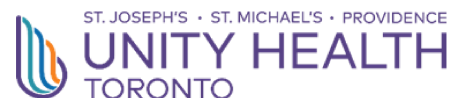

50 (algorithm\* adj2 (screening or examination or test or tested or testing or assessment\* or diagnosis or diagnoses or diagnosed or diagnosing)).ti,ab,kf. 9323

51 (algorithm\* adj2 (pharmacotherap\* or chemotherap\* or chemotreatment\* or therap\* or treatment\* or intervention\*)).ti,ab,kf. 11926

52 (guideline\* or standards or consensus\* or recommendat\*).au. 557

53 (guideline\* or standards or consensus\* or recommendat\*).co. 0

54 (guideline\* or standards or consensus\* or recommendat\*).ca. 1257

55 or/26-54 [Guidelines - Broad - MEDLINE, Embase, PsycInfo. In: CADTH Search Filters Database. Ottawa: CADTH; 2022: <https://searchfilters.cadth.ca/link/26>. Accessed 2022-06-02. ] 712083

56 25 and 55 1109

57 limit 56 to "all child (0 to 18 years)" 182

58 limit 57 to "all adult (19 plus years)" 103

59 56 not (57 not 58) 1030

60 limit 59 to english language 1004

61 limit 60 to yr="2010 -Current" 889

62 remove duplicates from 61 887

#### APA PsycInfo <1987 to July Week 2 2022>

1 online therapy/ 3690

2 telepsychiatry/ or telepsychology/ 741

3 (distance counselling or distance counseling).tw. 47

4 (telemental health\* or Tele mental health\* or telepsych\* or tele psych\*).tw. 1405

5 (psychotherap\* adj3 (internet or web or phone\* or telephone\* or computer\* or online or remote or smartphone\* or cellphone\* or virtual or video\* or zoom or digital)).tw. 966

6 (mental health care adj3 (internet or web or phone\* or telephone\* or computer\* or online or remote or smartphone\* or cellphone\* or virtual or video\* or zoom or digital)).tw. 91

7 (mental healthcare adj3 (internet or web or phone\* or telephone\* or computer\* or online or remote or smartphone\* or cellphone\* or virtual or video\* or zoom or digital)).tw. 32

8 or/1-7 5791

9 mental disorders/ or exp affective disorders/ or exp anxiety disorders/ or exp bipolar disorder/ or borderline states/ or exp chronic mental illness/ or exp dissociative disorders/ or exp eating disorders/ or exp personality disorders/ or exp psychosis/ or serious mental illness/ or exp somatoform disorders/ or exp "stress and trauma related disorders"/ or exp thought disturbances/ 487135

10 psychiatric patients/ 17465

11 mental health/ 75194

12 exp psychotherapy/ or exp cognitive therapy/ 186110

13 counseling/ or group counseling/ or exp psychotherapeutic counseling/ 41702

14 exp mental health services/ or community mental health centers/ 43014

15 clinical psychology/ 7117

16 suicidal ideation/ or attempted suicide/ or suicidality/ 20146

17 exp self-injurious behavior/ 6576



- 18 (mental health or mental illness\* or mentally ill or mental disorder\* or psychiatr\* or psycholog\* or psychosis or psychotic or psychoses or bipolar or depression or depressive or anxiety or schizophreni\* or PTSD or post traumatic or posttraumatic or stress disorder\* or suicidal or attempt\* suicide or suicide attempt\* or self harm or self injur\* or counselling or counseling or psychotherap\* or behaviour\* therap\* or behavior\* therap\* or cognitive therap\* or Obsessive Compulsive Disorder\* or OCD or Panic Disorder\* or Phobic Disorder\* or Anorexi\* or Binge Eating or bulimi\* or Mood Disorder\* or personality disorder\* or dissociative disorder\* or eating disorder\* or Schizoaffective Disorder\* or affective Disorder\*).tw. 1326305
- 19 9 or 10 or 11 or 12 or 13 or 14 or 15 or 16 or 17 or 18 1424019
- 20 telemedicine/ or exp teleconferencing/ or teleconsultation/ 7922
- 21 digital interventions/ 955
- 22 (telemedicine or tele-medicine or telehealth\* or tele health\* or remote consult\* or virtual care or virtual mental health or virtual delivery or virtual health\* or virtual primary care or virtual service\* or phone call\* or telephone call\*).tw. 8298
- 23 (therap\* adj3 (internet or web or phone\* or telephone\* or computer\* or online or remote or smartphone\* or cellphone\* or virtual or video\* or zoom or digital)).tw. 4350
- 24 20 or 21 or 22 or 23 16820
- 25 19 and 24 8646
- 26 8 or 25 12110
- 27 exp treatment guidelines/ 8469
- 28 best practices/ 5895
- 29 (standard or standards or guideline\*).ti. 16652
- 30 (standard or standards or guideline\* or best practice\* or consensus or recommendation\*).ti. 28578
- 31 (position statement\* or policy statement\* or practice parameter\*).tw. 1791
- 32 ((practice or treatment\* or clinical) adj guideline\*).ab. 8621
- 33 ((critical or clinical or practice) adj2 (path or paths or pathway or pathways or protocol\*)).tw. 2320
- 34 guideline recommendation\*.ab.435
- 35 (care adj2 (standard or path or paths or pathway or pathways or map or maps or plan or plans)).tw. 9778
- 36 27 or 28 or 29 or 30 or 31 or 32 or 33 or 34 or 35 56132
- 37 26 and 36 480
- 38 limit 37 to (100 childhood <birth to age 12 yrs> or 120 neonatal <birth to age 1 mo> or 140 infancy <2 to 23 mo> or 160 preschool age <age 2 to 5 yrs> or 180 school age <age 6 to 12 yrs> or 200 adolescence <age 13 to 17 yrs>)58
- 39 limit 38 to ("300 adulthood <age 18 yrs and older>" or 320 young adulthood <age 18 to 29 yrs> or 340 thirties <age 30 to 39 yrs> or 360 middle age <age 40 to 64 yrs> or "380 aged <age 65 yrs and older>" or "390 very old <age 85 yrs and older>") 20
- 40 38 not 39 38
- 41 37 not 40 442
- 42 limit 41 to (chapter or "column/opinion" or "comment/reply" or dissertation or editorial or letter or review-book) 73



43 41 not 42 369  
 44 limit 43 to (english language and yr="2010 -Current") 271

#### Embase Classic+Embase <1947 to 2022 July 20>

1 mental disease/ or exp anxiety disorder/ or exp dissociative disorder/ or exp emotional disorder/ or exp mood disorder/ or exp neurosis/ or exp personality disorder/ or exp psychosis/ or exp psychosomatic disorder/ or exp psychotrauma/ or exp schizophrenia spectrum disorder/ or exp thought disorder/ 1771301

2 eating disorder/ or anorexia nervosa/ or binge eating disorder/ or bulimia/ 56644

3 exp suicidal behavior/ 122831

4 mental patient/ 31222

5 mental health/ 182501

6 psychotherapy/ or exp behavior therapy/ or client centered therapy/ or exp cognitive therapy/ or couple therapy/ or emotion-focused therapy/ or "eye movement desensitization and reprocessing"/ or family therapy/ or gestalt therapy/ or group therapy/ or interpersonal psychotherapy/ or marital therapy/ or psychodynamic psychotherapy/ or psychosocial intervention/ or rational emotive behavior therapy/ or reality therapy/ or short term psychotherapy/ or solution-focused therapy/ 223799

7 psychological counseling/ 436

8 mental health care/ or psychosocial care/ 52890

9 community mental health service/ or mental health service/ 65935

10 clinical psychology/ 6856

11 psychiatry/ or emergency psychiatry/ 81615

12 (mental health or mental illness\* or mentally ill or mental disorder\* or psychiatr\* or psycholog\* or psychosis or psychotic or psychoses or bipolar or depression or depressive or anxiety or schizophreni\* or PTSD or post traumatic or posttraumatic or stress disorder\* or suicidal or attempt\* suicide or suicide attempt\* or self harm or self injur\* or counselling or counseling or psychotherap\* or behaviour\* therap\* or behavior\* therap\* or cognitive therap\* or Obsessive Compulsive Disorder\* or OCD or Panic Disorder\* or Phobic Disorder\* or Anorexi\* or Binge Eating or bulimi\* or Mood Disorder\* or personality disorder\* or dissociative disorder\* or eating disorder\* or Schizoaffective Disorder\* or affective Disorder\*).tw,kf. 2124174

13 or/1-12 3057114

14 telehealth/ or telecare/ or telenursing/ 14670

15 telemedicine/ or video consultation/ 38819

16 teleconsultation/ 13704

17 exp mobile phone/ or telephone/ or web conferencing/ 83788

18 videoconferencing/ 7221

19 (telemedicine or tele-medicine or telehealth\* or tele health\* or remote consult\* or virtual care or virtual mental health or virtual delivery or virtual health\* or virtual primary care or virtual service\* or phone call\* or telephone call\*).tw,kf. 56379

20 (therap\* adj3 (internet or web or phone\* or telephone\* or computer\* or online or remote or smartphone\* or cellphone\* or virtual or video\* or zoom or digital)).tw,kf. 9020



- 21 (psychotherap\* adj3 (internet or web or phone\* or telephone\* or computer\* or online or remote or smartphone\* or cellphone\* or virtual or video\* or zoom or digital)).tw,kf. 765
- 22 (mental health care adj3 (internet or web or phone\* or telephone\* or computer\* or online or remote or smartphone\* or cellphone\* or virtual or video\* or zoom or digital)).tw,kf. 125
- 23 (mental healthcare adj3 (internet or web or phone\* or telephone\* or computer\* or online or remote or smartphone\* or cellphone\* or virtual or video\* or zoom or digital)).tw,kf. 50
- 24 or/14-23 170964
- 25 13 and 24 36472
- 26 telepsychiatry/ or telepsychology/ or teletherapy/ or telepsychotherapy/ or e-counseling/ 3051
- 27 (Telemental health or Tele-mental health or telepsych\* or tele psych\*).tw,kf. 1758
- 28 25 or 26 or 27 38731
- 29 (guideline\* or standards or consensus\* or recommendat\*).ti. 232472
- 30 (practice parameter\* or position statement\* or policy statement\* or CPG or CPGs or best practice\*).ti. 21268
- 31 (care adj2 (path or paths or pathway or pathways or map or maps or plan or plans or standard)).ti. 11960
- 32 ((critical or clinical or practice) adj2 (path or paths or pathway or pathways or protocol\*)).ti. 5963
- 33 (guideline\* or standards or consensus\* or recommendat\*).au. 26
- 34 (guideline\* or standards or consensus\* or recommendat\*).co. 1860
- 35 systematic review.ti,pt,kf,sh. and (practice guideline\* or treatment guideline\* or clinical guideline\* or guideline recommendation\*).ti,ab,kf. 7561
- 36 guidelines as topic/ 463763
- 37 exp practice guideline/ 653366
- 38 practice guidelines as topic/ 397009
- 39 health planning guidelines/ 105973
- 40 or/29-39 [CADTH Guidelines Search Filters, Adapted] 901280
- 41 28 and 40 2873
- 42 limit 41 to (infant <to one year> or child <unspecified age> or preschool child <1 to 6 years> or school child <7 to 12 years> or adolescent <13 to 17 years>) 354
- 43 limit 42 to (adult <18 to 64 years> or aged <65+ years>) 142
- 44 42 not 43 212
- 45 41 not 44 2661
- 46 limit 45 to (books or chapter or conference abstract or conference paper or "conference review" or editorial or letter) 711
- 47 45 not 46 1950
- 48 limit 47 to (english language and yr="2010 -Current") 1592
- 49 limit 48 to embase 1425

**Search History**

Interface - EBSCOhost Research Databases

Search Screen - Advanced Search

Database - CINAHL Complete



| #   | Query                                                                                                                                                                                                                                                                                                                                                                                                                                                                                                                                                                                                                                                                                                                                                                                                                                                                                                                                                                                                                                                                                                                                                                                                                                                                                                                                                                                                                                                                                                                                                                                                                                                                                             | Limiters/Expanders                                                                                                                                                                                                                                                                                                                                                                                                   | Results |
|-----|---------------------------------------------------------------------------------------------------------------------------------------------------------------------------------------------------------------------------------------------------------------------------------------------------------------------------------------------------------------------------------------------------------------------------------------------------------------------------------------------------------------------------------------------------------------------------------------------------------------------------------------------------------------------------------------------------------------------------------------------------------------------------------------------------------------------------------------------------------------------------------------------------------------------------------------------------------------------------------------------------------------------------------------------------------------------------------------------------------------------------------------------------------------------------------------------------------------------------------------------------------------------------------------------------------------------------------------------------------------------------------------------------------------------------------------------------------------------------------------------------------------------------------------------------------------------------------------------------------------------------------------------------------------------------------------------------|----------------------------------------------------------------------------------------------------------------------------------------------------------------------------------------------------------------------------------------------------------------------------------------------------------------------------------------------------------------------------------------------------------------------|---------|
| S26 | S24 NOT S25                                                                                                                                                                                                                                                                                                                                                                                                                                                                                                                                                                                                                                                                                                                                                                                                                                                                                                                                                                                                                                                                                                                                                                                                                                                                                                                                                                                                                                                                                                                                                                                                                                                                                       | Expanders - Apply equivalent subjects<br>Search modes - Boolean/Phrase                                                                                                                                                                                                                                                                                                                                               | 658     |
| S25 | S24                                                                                                                                                                                                                                                                                                                                                                                                                                                                                                                                                                                                                                                                                                                                                                                                                                                                                                                                                                                                                                                                                                                                                                                                                                                                                                                                                                                                                                                                                                                                                                                                                                                                                               | Limiters - Publication Type: Book, Book Chapter, Book Review, Commentary, Doctoral Dissertation, Editorial, Letter, Masters Thesis, Proceedings, Response<br>Expanders - Apply equivalent subjects<br>Search modes - Boolean/Phrase                                                                                                                                                                                  | 30      |
| S24 | S22 AND S23                                                                                                                                                                                                                                                                                                                                                                                                                                                                                                                                                                                                                                                                                                                                                                                                                                                                                                                                                                                                                                                                                                                                                                                                                                                                                                                                                                                                                                                                                                                                                                                                                                                                                       | Limiters - Published Date: 20100101-20231231; English Language<br>Expanders - Apply equivalent subjects<br>Search modes - Boolean/Phrase                                                                                                                                                                                                                                                                             | 688     |
| S23 | MH Critical Path or MH Practice Guidelines or PT (practice guidelines or standards or protocol or critical path or care plan) or TI ("position statement*" or "policy statement*" or "practice parameter*" or "best practice*" OR AB ("position statement*" or "policy statement*" or "practice parameter*" or "best practice*" or TI (standards or guideline or guidelines) or AB (practice N1 guideline* or treatment* N1 guideline*) or TI (CPG or CPGs) or TI consensus* or AB consensus* or AU (guideline* or standards or consensus* or recommendat*) or CA (guideline* or standards or consensus* or recommendat*) or TI (critical N2 path or critical N2 paths or critical N2 pathway or critical N2 pathways or critical N2 protocol* or clinical N2 path or clinical N2 paths or clinical N2 pathway or clinical N2 pathways or clinical N2 protocol* or practice N2 path or practice N2 paths or practice N2 pathway or practice N2 pathways or practice N2 protocol*) or AB (critical N2 path or critical N2 paths or critical N2 pathway or critical N2 pathways or critical N2 protocol* or clinical N2 path or clinical N2 paths or clinical N2 pathway or clinical N2 pathways or clinical N2 protocol* or practice N2 path or practice N2 paths or practice N2 pathway or practice N2 pathways or practice N2 protocol*) or TI recommendat* or TI (care N2 path or care N2 paths or care N2 pathway or care N2 pathways or care N2 map or care N2 maps or care N2 plan or care N2 plans or care N2 standard*) or AB (care N2 path or care N2 paths or care N2 pathway or care N2 pathways or care N2 map or care N2 maps or care N2 plan or care N2 plans or care N2 standard*)) | Expanders - Apply equivalent subjects<br>Search modes - Boolean/Phrase<br><br><i>Note – the is a modified version of</i><br><br><i>Guidelines - Broad - CINAHL. In: CADTH Search Filters Database. Ottawa: CADTH; 2022: <a href="https://searchfilters.cadth.ca/link/74">https://searchfilters.cadth.ca/link/74</a>. Accessed 2022-07-22.</i><br><br><i>The search strings for algorithms at the end wereremoved</i> | 307,665 |
| S22 | S1 OR S21                                                                                                                                                                                                                                                                                                                                                                                                                                                                                                                                                                                                                                                                                                                                                                                                                                                                                                                                                                                                                                                                                                                                                                                                                                                                                                                                                                                                                                                                                                                                                                                                                                                                                         | Expanders - Apply equivalent subjects<br>Search modes - Boolean/Phrase                                                                                                                                                                                                                                                                                                                                               | 12,322  |
| S21 | S9 AND S20                                                                                                                                                                                                                                                                                                                                                                                                                                                                                                                                                                                                                                                                                                                                                                                                                                                                                                                                                                                                                                                                                                                                                                                                                                                                                                                                                                                                                                                                                                                                                                                                                                                                                        | Expanders - Apply equivalent subjects<br>Search modes - Boolean/Phrase                                                                                                                                                                                                                                                                                                                                               | 11,973  |
| S20 | S10 OR S11 OR S14 OR S15 OR S16 OR S17 OR S18 OR S19                                                                                                                                                                                                                                                                                                                                                                                                                                                                                                                                                                                                                                                                                                                                                                                                                                                                                                                                                                                                                                                                                                                                                                                                                                                                                                                                                                                                                                                                                                                                                                                                                                              | Expanders - Apply equivalent subjects<br>Search modes - Boolean/Phrase                                                                                                                                                                                                                                                                                                                                               | 55,833  |
| S19 | (mental healthcare N3 (internet or web or phone* or telephone* or computer* or online or remote or smartphone* or cellphone* or virtual or video* or zoom or digital))                                                                                                                                                                                                                                                                                                                                                                                                                                                                                                                                                                                                                                                                                                                                                                                                                                                                                                                                                                                                                                                                                                                                                                                                                                                                                                                                                                                                                                                                                                                            | Expanders - Apply equivalent subjects<br>Search modes - Boolean/Phrase                                                                                                                                                                                                                                                                                                                                               | 114     |
| S18 | (mental health care N3 (internet or web or phone* or telephone* or computer* or online or remote or smartphone* or cellphone* or virtual or video* or zoom or digital))                                                                                                                                                                                                                                                                                                                                                                                                                                                                                                                                                                                                                                                                                                                                                                                                                                                                                                                                                                                                                                                                                                                                                                                                                                                                                                                                                                                                                                                                                                                           | Expanders - Apply equivalent subjects<br>Search modes - Boolean/Phrase                                                                                                                                                                                                                                                                                                                                               | 114     |
| S17 | (psychotherap* N3 (internet or web or phone* or telephone* or computer* or online or remote or smartphone* or cellphone* or virtual or video* or zoom or digital))                                                                                                                                                                                                                                                                                                                                                                                                                                                                                                                                                                                                                                                                                                                                                                                                                                                                                                                                                                                                                                                                                                                                                                                                                                                                                                                                                                                                                                                                                                                                | Expanders - Apply equivalent subjects<br>Search modes - Boolean/Phrase                                                                                                                                                                                                                                                                                                                                               | 321     |





|     |                                                                                                                                                                                                                                                                                                                                                                                                                                                                                                                                                                                                                                                                                                                                               |                                                                        |         |
|-----|-----------------------------------------------------------------------------------------------------------------------------------------------------------------------------------------------------------------------------------------------------------------------------------------------------------------------------------------------------------------------------------------------------------------------------------------------------------------------------------------------------------------------------------------------------------------------------------------------------------------------------------------------------------------------------------------------------------------------------------------------|------------------------------------------------------------------------|---------|
| S16 | (therap* N3 (internet or web or phone* or telephone* or computer* or online or remote or smartphone* or cellphone* or virtual or video* or zoom or digital))                                                                                                                                                                                                                                                                                                                                                                                                                                                                                                                                                                                  | Expanders - Apply equivalent subjects<br>Search modes - Boolean/Phrase | 10,636  |
| S15 | (telemedicine or tele-medicine or telehealth* or tele health* or remote consult* or virtual care or virtual mental health or virtual delivery or virtual health* or virtual primary care or virtual service* or phone call* or telephone call*)                                                                                                                                                                                                                                                                                                                                                                                                                                                                                               | Expanders - Apply equivalent subjects<br>Search modes - Boolean/Phrase | 38,830  |
| S14 | S12 AND S13                                                                                                                                                                                                                                                                                                                                                                                                                                                                                                                                                                                                                                                                                                                                   | Expanders - Apply equivalent subjects<br>Search modes - Boolean/Phrase | 2,595   |
| S13 | {MH "Telecommunications"} OR {MH "Internet"} OR {MH "Email"} OR {MH "Internet-Based Intervention"} OR {MH "Internet Access"} OR {MH "Telephone+"}                                                                                                                                                                                                                                                                                                                                                                                                                                                                                                                                                                                             | Expanders - Apply equivalent subjects<br>Search modes - Boolean/Phrase | 87,445  |
| S12 | {MH "Professional-Patient Relations"} OR {MH "Physician-Patient Relations"} OR {MH "Professional-Client Relations+"}                                                                                                                                                                                                                                                                                                                                                                                                                                                                                                                                                                                                                          | Expanders - Apply equivalent subjects<br>Search modes - Boolean/Phrase | 79,307  |
| S11 | {MH "Videoconferencing"} OR {MH "Teleconferencing"}                                                                                                                                                                                                                                                                                                                                                                                                                                                                                                                                                                                                                                                                                           | Expanders - Apply equivalent subjects<br>Search modes - Boolean/Phrase | 4,705   |
| S10 | {MH "Telehealth"} OR {MH "Telemedicine"} OR {MH "Remote Consultation"} OR {MH "Telenursing"}                                                                                                                                                                                                                                                                                                                                                                                                                                                                                                                                                                                                                                                  | Expanders - Apply equivalent subjects<br>Search modes - Boolean/Phrase | 30,965  |
| S9  | S2 OR S3 OR S4 OR S5 OR S6 OR S7 OR S8                                                                                                                                                                                                                                                                                                                                                                                                                                                                                                                                                                                                                                                                                                        | Expanders - Apply equivalent subjects<br>Search modes - Boolean/Phrase | 985,913 |
| S8  | (mental health or mental illness* or mentally ill or mental disorder* or psychiatr* or psycholog* or psychosis or psychotic or psychoses or bipolar or depression or depressive or anxiety or schizophreni* or PTSD or post traumatic or posttraumatic or stress disorder* or suicidal or attempt* suicide or suicide attempt* or self harm or self injur* or counselling or counseling or psychotherap* or behaviour* therap* or behavior* therap* or cognitive therap* or Obsessive Compulsive Disorder* or OCD or Panic Disorder* or Phobic Disorder* or Anorexi* or Binge Eating or bulimi* or Mood Disorder* or personality disorder* or dissociative disorder* or eating disorder* or Schizoaffective Disorder* or affective Disorder*) | Expanders - Apply equivalent subjects<br>Search modes - Boolean/Phrase | 907,260 |
| S7  | {MH "Psychology, Clinical"}                                                                                                                                                                                                                                                                                                                                                                                                                                                                                                                                                                                                                                                                                                                   | Expanders - Apply equivalent subjects<br>Search modes - Boolean/Phrase | 1,074   |
| S6  | {MH "Eating Disorders"} OR {MH "Anorexia"} OR {MH "Anorexia Nervosa"} OR {MH "Binge Eating Disorder"} OR {MH "Bulimia"} OR {MH "Bulimia Nervosa"} OR {MH "Self-Injurious Behavior"} OR {MH "Suicidal Ideation"} OR {MH "Suicide, Attempted"} OR {MH "Depression"} OR {MH "Anxiety"}                                                                                                                                                                                                                                                                                                                                                                                                                                                           | Expanders - Apply equivalent subjects<br>Search modes - Boolean/Phrase | 184,160 |
| S5  | {MH "Mental Health Services"} OR {MH "Counseling"} OR {MH "Couples Counseling"} OR {MH "Emergency Services, Psychiatric+"} OR {MH "Social Work, Psychiatric"}                                                                                                                                                                                                                                                                                                                                                                                                                                                                                                                                                                                 | Expanders - Apply equivalent subjects<br>Search modes - Boolean/Phrase | 73,532  |
| S4  | {MH "Mental Health"}                                                                                                                                                                                                                                                                                                                                                                                                                                                                                                                                                                                                                                                                                                                          | Expanders - Apply equivalent subjects<br>Search modes - Boolean/Phrase | 50,531  |
| S3  | {MH "Psychotherapy"} OR {MH "Behavior Therapy+"} OR {MH "Desensitization, Psychologic+"} OR {MH "Crisis Intervention"} OR {MH "Interpersonal Psychotherapy"} OR {MH "Mentalization-Based Therapy"} OR {MH "Psychosocial Intervention"} OR {MH "Psychotherapy, Brief+"} OR {MH "Psychotherapy, Psychodynamic"} OR {MH "Reality Therapy"} OR {MH "Psychotherapy, Group"} OR {MH "Family Therapy"} OR {MH "Psychopharmacology"}                                                                                                                                                                                                                                                                                                                  | Expanders - Apply equivalent subjects<br>Search modes - Boolean/Phrase | 78,370  |



|    |                                                                                                                                                                                                                                                                                                           |                                                                        |         |
|----|-----------------------------------------------------------------------------------------------------------------------------------------------------------------------------------------------------------------------------------------------------------------------------------------------------------|------------------------------------------------------------------------|---------|
| S2 | (MH "Mental Disorders") OR (MH "Adjustment Disorders+") OR (MH "Mental Disorders, Chronic") OR (MH "Neurotic Disorders+") OR (MH "Organic Mental Disorders, Psychotic") OR (MH "Personality Disorders+") OR (MH "Psychotic Disorders+") OR (MH "Psychiatric Emergencies") OR (MH "Psychological Trauma+") | Expanders - Apply equivalent subjects<br>Search modes - Boolean/Phrase | 376,717 |
| S1 | (MH "Telepsychiatry")                                                                                                                                                                                                                                                                                     | Expanders - Apply equivalent subjects<br>Search modes - Boolean/Phrase | 618     |

### Scopus

630 document results

(( ABS ("treatment guideline\*" OR "practice guideline\*" OR "treatment guideline\*" OR "clinical guideline\*" OR "guideline recommendation\*") ) OR (( TITLE ( care W/2 standard\* ) OR ABS ( care W/2 standard\* ) ) OR ( TITLE ( standard OR standards OR guideline\* OR "best practice\*" OR consensus OR recommendation\* OR "position statement\*" OR "policy statement\*" OR "practice parameter\*" ) ) ) AND ( ( TITLE-ABS-KEY ( ( "telemental health\*" OR "tele mental health\*" OR telepsych\* OR "tele psych\*" ) ) OR ( ( TITLE-ABS-KEY ( therap\* W/3 ( internet OR web OR phone\* OR telephone\* OR computer\* OR online OR remote OR smartphone\* OR cellphone\* OR virtual OR video\* OR zoom OR digital ) ) ) OR ( TITLE-ABS-KEY ( psychotherap\* W/3 ( internet OR web OR phone\* OR telephone\* OR computer\* OR online OR remote OR smartphone\* OR cellphone\* OR virtual OR video\* OR zoom OR digital ) ) ) OR ( TITLE-ABS-KEY ( telemedicine OR "tele-medicine" OR telehealth\* OR "tele health\*" OR "remote consult\*" OR "virtual care" OR "virtual mental health" OR "virtual delivery" OR "virtual health\*" OR "virtual primary care" OR "virtual service\*" OR "phone call\*" OR "telephone call\*" ) ) OR ( TITLE-ABS-KEY ( "mental health care" W/3 ( internet OR web OR phone\* OR telephone\* OR computer\* OR online OR remote OR smartphone\* OR cellphone\* OR virtual OR video\* OR zoom OR digital ) ) ) OR ( TITLE-ABS-KEY ( "mental healthcare" W/3 ( internet OR web OR phone\* OR telephone\* OR computer\* OR online OR remote OR smartphone\* OR cellphone\* OR virtual OR video\* OR zoom OR digital ) ) ) ) AND ( TITLE-ABS ( ( "mental health" OR "mental illness\*" OR "mentally ill" OR "mental disorder\*" OR psychiatr\* OR psycholog\* OR psychosis OR psychotic OR psychoses OR bipolar OR depression OR depressive OR anxiety OR schizophreni\* OR ptsd OR "post traumatic" OR posttraumatic OR "stress disorder\*" OR suicidal OR "attempt\* suicide" OR "suicide attempt\*" OR "self harm" OR "self injur\*" OR counselling OR counseling OR psychotherap\* OR "behaviour\* therap\*" OR "behavior\* therap\*" OR "cognitive therap\*" OR "obsessive compulsive disorder\*" OR ocd OR "panic disorder\*" OR "phobic disorder\*" OR anorexi\* OR "binge eating" OR bulimi\* OR "mood disorder\*" OR "personality disorder\*" OR "dissociative disorder\*" OR "eating disorder\*" OR "schizoaffective disorder\*" OR "affective disorder\*" ) ) ) ) AND ( LIMIT-TO ( PUBYEAR , 2022 ) OR LIMIT-TO ( PUBYEAR , 2021 ) OR LIMIT-TO ( PUBYEAR , 2020 ) OR LIMIT-TO ( PUBYEAR , 2019 ) OR LIMIT-TO ( PUBYEAR , 2018 ) OR LIMIT-TO ( PUBYEAR , 2017 ) OR LIMIT-TO ( PUBYEAR , 2016 ) OR LIMIT-TO ( PUBYEAR , 2015 ) OR LIMIT-TO ( PUBYEAR , 2014 ) OR LIMIT-TO ( PUBYEAR , 2013 ) OR LIMIT-TO ( PUBYEAR , 2012 ) OR LIMIT-TO ( PUBYEAR , 2011 ) OR LIMIT-TO ( PUBYEAR , 2010 ) ) AND ( LIMIT-TO ( LANGUAGE , "English" ) ) AND ( EXCLUDE ( DOCTYPE , "cp" ) OR EXCLUDE ( DOCTYPE , "le" ) OR EXCLUDE ( DOCTYPE , "no" ) OR EXCLUDE ( DOCTYPE , "ed" ) OR EXCLUDE ( DOCTYPE , "ch" ) OR EXCLUDE ( DOCTYPE , "cr" ) )



**EBM Reviews - Cochrane Central Register of Controlled Trials <June 2022>**

**EBM Reviews - Cochrane Database of Systematic Reviews <2005 to July 20, 2022>**

- 1 mental disorders/ or exp anxiety disorders/ or exp "bipolar and related disorders"/ or exp "disruptive, impulse control, and conduct disorders"/ or exp dissociative disorders/ or exp "feeding and eating disorders"/ or exp mood disorders/ or exp tic disorders/ or neurotic disorders/ or exp personality disorders/ or exp "schizophrenia spectrum and other psychotic disorders"/ or exp somatoform disorders/ or exp "trauma and stressor related disorders"/ 41573
- 2 Mentally Ill Persons/ 60
- 3 Mental Health/ 1932
- 4 psychotherapy/ or exp behavior therapy/ or emotion-focused therapy/ or exp feedback, psychological/ or interpersonal psychotherapy/ or person-centered psychotherapy/ or exp psychoanalytic therapy/ or psychosocial intervention/ or exp psychotherapeutic processes/ or psychotherapy, brief/ or psychotherapy, multiple/ or psychotherapy, psychodynamic/ or psychotherapy, rational-emotive/ or reality therapy/ or socioenvironmental therapy/ or exp psychotherapy, group/ or therapeutic alliance/ 24097
- 5 Counseling/ 4546
- 6 psychiatric rehabilitation/ or mental health recovery/ or mental health services/ or exp emergency services, psychiatric/ or social work, psychiatric/ 886
- 7 affective symptoms/ or depression/ or exp stress, psychological/ or exp compulsive behavior/ or exp anger/ or anxiety/ or self-injurious behavior/ or suicidal ideation/ or suicide, attempted/ 27376
- 8 Psychology, Clinical/ 30
- 9 psychiatry/ or community psychiatry/ or psychoanalysis/ or psychosomatic medicine/ 219
- 10 Community Mental Health Services/ or exp Community Mental Health Centers/ 860
- 11 (mental health or mental illness\* or mentally ill or mental disorder\* or psychiatr\* or psycholog\* or psychosis or psychotic or psychoses or bipolar or depression or depressive or anxiety or schizophreni\* or PTSD or post traumatic or posttraumatic or stress disorder\* or suicidal or attempt\* suicide or suicide attempt\* or self harm or self injur\* or counselling or counseling or psychotherap\* or behaviour\* therap\* or behavior\* therap\* or cognitive therap\* or Obsessive Compulsive Disorder\* or OCD or Panic Disorder\* or Phobic Disorder\* or Anorexi\* or Binge Eating or bulimi\* or Mood Disorder\* or personality disorder\* or dissociative disorder\* or eating disorder\* or Schizoaffective Disorder\* or affective Disorder\*).ti. 101111
- 12 or/1-11 137305
- 13 telemedicine/ 2734
- 14 Videoconferencing/ 220
- 15 remote consultation/ 390
- 16 (telecommunications/ or telephone/ or exp cell phone/ or computer communication networks/ or internet/ or internet access/ or internet-based intervention/) and (professional-patient relations/ or nurse-patient relations/ or physician-patient relations/) 178
- 17 (telemedicine or tele-medicine or telehealth\* or tele health\* or remote consult\* or virtual care or virtual mental health or virtual delivery or virtual health\* or virtual primary care or virtual service\* or phone call\* or telephone call\*).tw,kf. 11805



- 18 (therap\* adj3 (internet or web or phone\* or telephone\* or computer\* or online or remote or smartphone\* or cellphone\* or virtual or video\* or zoom or digital)).tw,kf. 3430
- 19 (psychotherap\* adj3 (internet or web or phone\* or telephone\* or computer\* or online or remote or smartphone\* or cellphone\* or virtual or video\* or zoom or digital)).tw,kf. 252
- 20 (mental health care adj3 (internet or web or phone\* or telephone\* or computer\* or online or remote or smartphone\* or cellphone\* or virtual or video\* or zoom or digital)).tw,kf. 24
- 21 (mental healthcare adj3 (internet or web or phone\* or telephone\* or computer\* or online or remote or smartphone\* or cellphone\* or virtual or video\* or zoom or digital)).tw,kf. 3
- 22 or/13-21 17434
- 23 Distance Counseling/ 22
- 24 (Telemental health or Tele-mental health or telepsych\* or tele psych\*).tw,kf. 201
- 25 (12 and 22) or 23 or 24 4222
- 26 (standards or guideline\* or "best practice\*" or consensus or recommendation\* or "position statement\*" or "policy statement\*" or "practice parameter\*").m\_titl. 5638
- 27 ("treatment guideline\*" or "practice guideline\*" or "treatment guideline\*" or "clinical guideline\*" or "guideline recommendation\*").tw. 8830
- 28 (care adj2 standard\*).m\_titl. 2685
- 29 26 or 27 or 28 16057
- 30 25 and 29 100
- 31 remove duplicates from 30 100
- 32 limit 31 to yr="2010 -Current" 79
